# Supplementary material
Source: publisher figshare collection journal article supplement (https://acs.figshare.com/ndownloader/files/14633399)
Supplement: Supplementary file 1 [file 14633399]

**Thermoresponsive Amphiphilic Functionalization of Thermally Reduced Graphene Oxide  
to Study Graphene/Bacteria Hydrophobic Interactions**

Kok H. Tan<sup>§</sup>, Shabnam Sattari<sup>‡</sup>, Siamak Beiranvand<sup>‡</sup>, Abbas Faghani<sup>§</sup>, Kai Ludwig<sup>†</sup>, Karin Schwibbert<sup>⊥</sup>, Christoph Böttcher<sup>†</sup>, Rainer Haag<sup>\*§</sup>, Mohsen Adeli<sup>\*§, ‡</sup>

<sup>§</sup>Institut für Chemie und Biochemie, Freie Universität Berlin, Takustr. 3, 14195, Berlin, Germany

<sup>‡</sup>Department of Chemistry, Faculty of Science, Lorestan University, Khorram Abad, Iran.

<sup>†</sup>Forschungszentrum für Elektronenmikroskopie and Core Facility BioSupraMol, Institut für Chemie und Biochemie, Freie Universität Berlin, Fabeckstr. 36a, 14195 Berlin, Germany

<sup>⊥</sup>Department of Materials and the Environment, Division of Biodeterioration and Reference Organisms of Bundesanstalt für Materialforschung und -prüfung, Unter den Eichen 87, 12205 Berlin, Germany

E-mail: haag@chemie.fu-berlin.de

E-mail: m.aadeli@fu-berlin.de

**Table of contents**

|                                                                            |    |
|----------------------------------------------------------------------------|----|
| 1. Results and discussion.....                                             | S2 |
| 2. Elemental analysis and calculations of number of functional groups..... | S2 |
| 3. Nuclear Magnetic Resonance.....                                         | S3 |
| 4. Cryo-TEM studies.....                                                   | S4 |

## 1. Results and discussion

PEG-G-PNIPAM was synthesized to investigate the hydrophobic interactions between graphene sheets and the bacteria. All compounds were characterized by IR, elemental analysis, NMR, TGA, Raman spectroscopy, DLS and Cryo-TEM.

## 2. Elemental analysis and calculations of the number of functional groups

**Table S1.** Element analysis of the polyethylene glycol derivatives and functionalized graphene sheets.

| Sample                      | Experimental |       |       | Calculated |       |       |
|-----------------------------|--------------|-------|-------|------------|-------|-------|
|                             | C (%)        | H (%) | N (%) | C (%)      | H (%) | N (%) |
| PEG                         | 52.25        | 10.51 | 0.00  | 53.4       | 9.00  | 0.00  |
| PEG-Trz                     | 54.84        | 8.90  | 1.68  | 51.39      | 8.33  | 1.95  |
| PEG-Trz-Ea                  | 53.13        | 8.92  | 2.22  | 51.92      | 8.51  | 2.58  |
| PEG-Trz-Ea(N <sub>3</sub> ) | 52.89        | 8.50  | 3.15  | 52.44      | 8.60  | 4.49  |
| PEG-G                       | 53.55        | 8.43  | 2.41  |            |       |       |
| PEG-G-PNIPAM                | 60.29        | 9.44  | 11.11 |            |       |       |

### a) PEG-G building block

Calculation of the number of carbon atom conjugated to one PEG-Trz-OH(N) based on the nitrogen content (2.41%) of the PEG-G

$$100 / X = 2.41 / 70; X = 2904.56 \text{ (the molecular weight of the PEG-G building block)}$$

Molecular weight of PEG-Trz-OH(N) group is 2150, therefore the carbon atom number which one PEG-Trz-OH(N) is conjugated can be calculated as below:

$2904.56 - 2150 = 754.56 / 12 = 62$  number of carbon atoms per one one PEG-Trz-OH(N) group.

### 3. Nuclear Magnetic Resonance

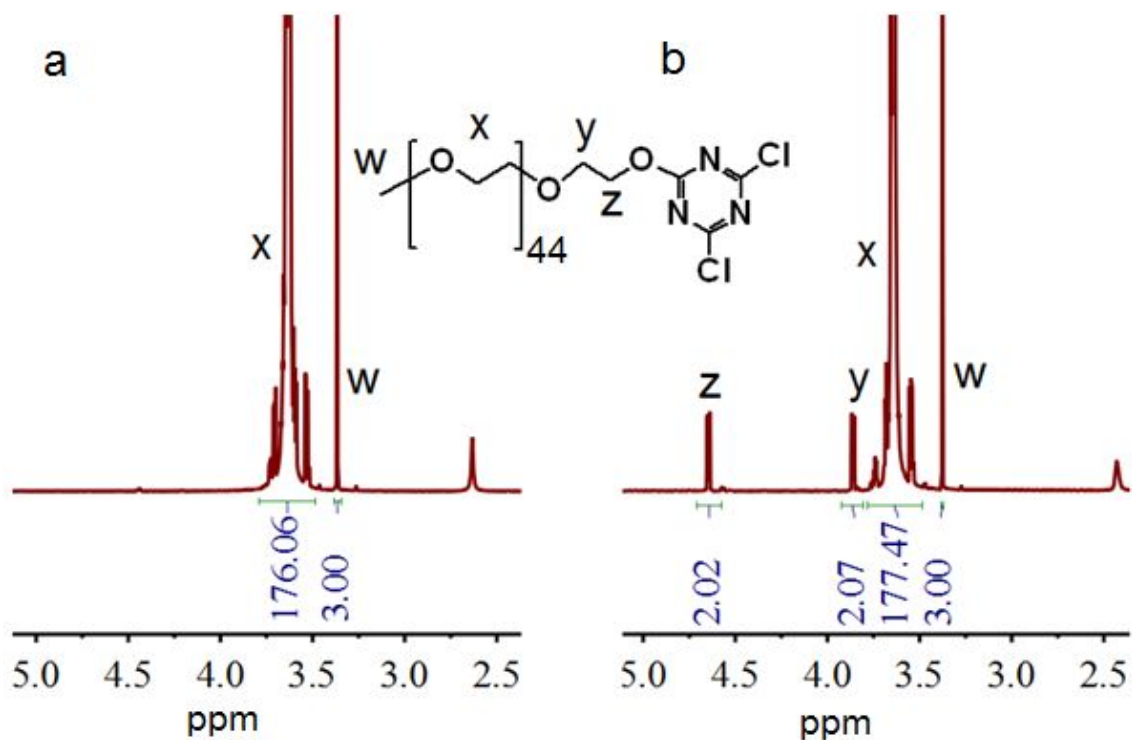

**Figure S1.**  $^1\text{H}$ -NMR spectra: (a) PEG and (b) PEG-Trz (700 MHz,  $\text{CDCl}_3$ ).

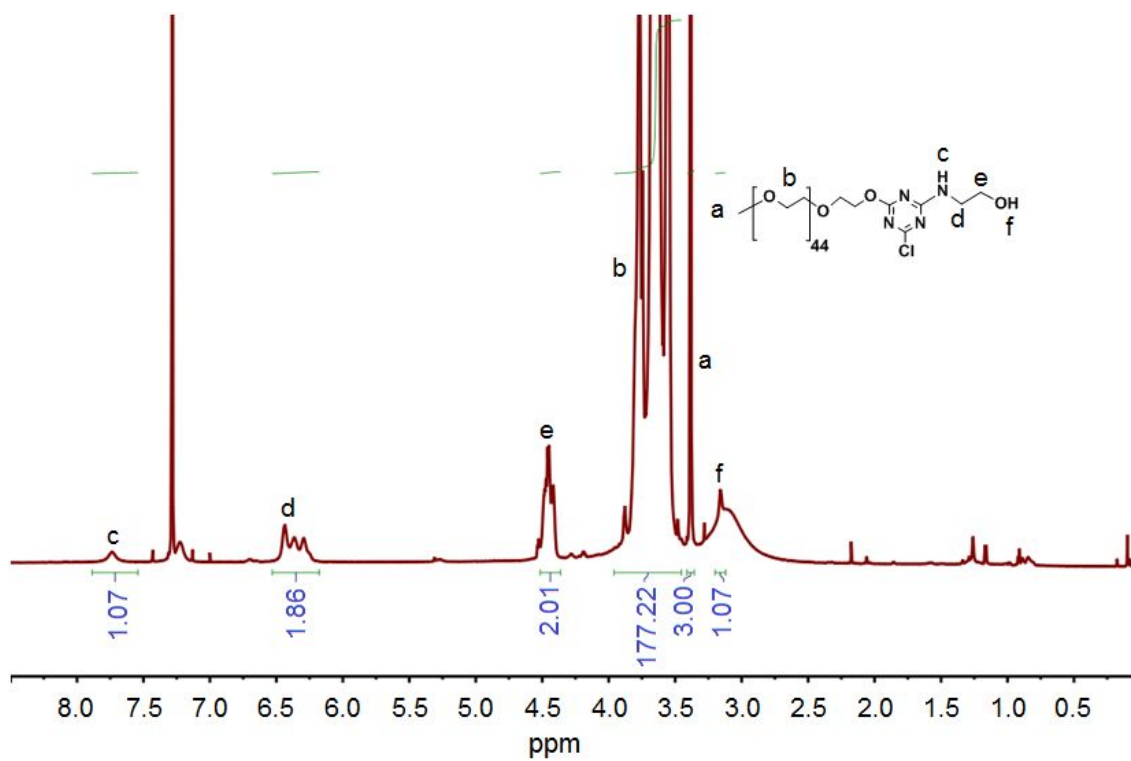

**Figure S2.**  $^1\text{H}$ -NMR spectrum of PEG-Trz-OH (700 MHz,  $\text{CDCl}_3$ ).

#### 4. Cryo-TEM studies

A

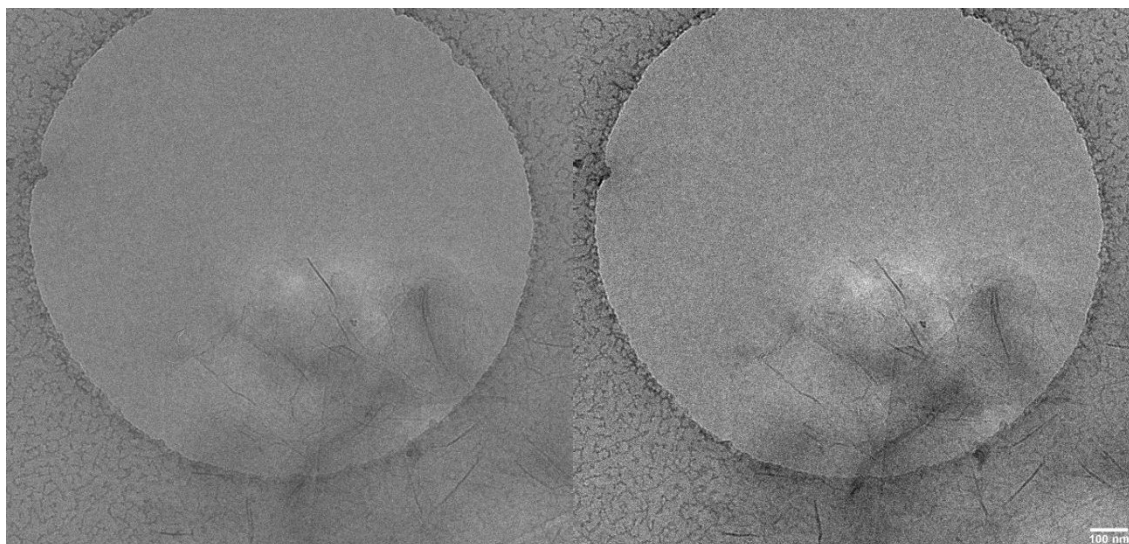

B

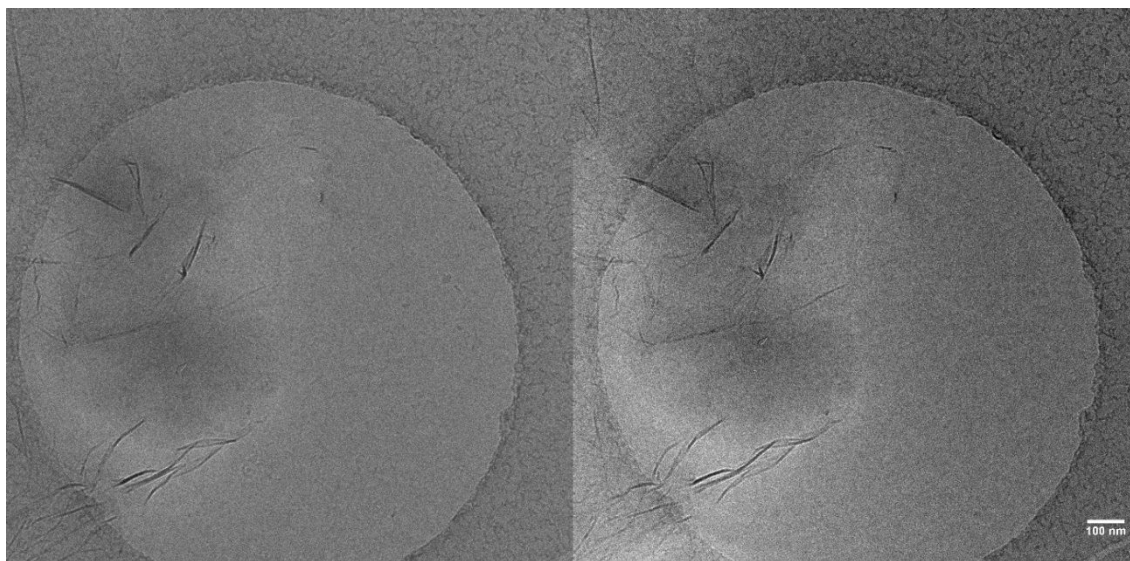

C

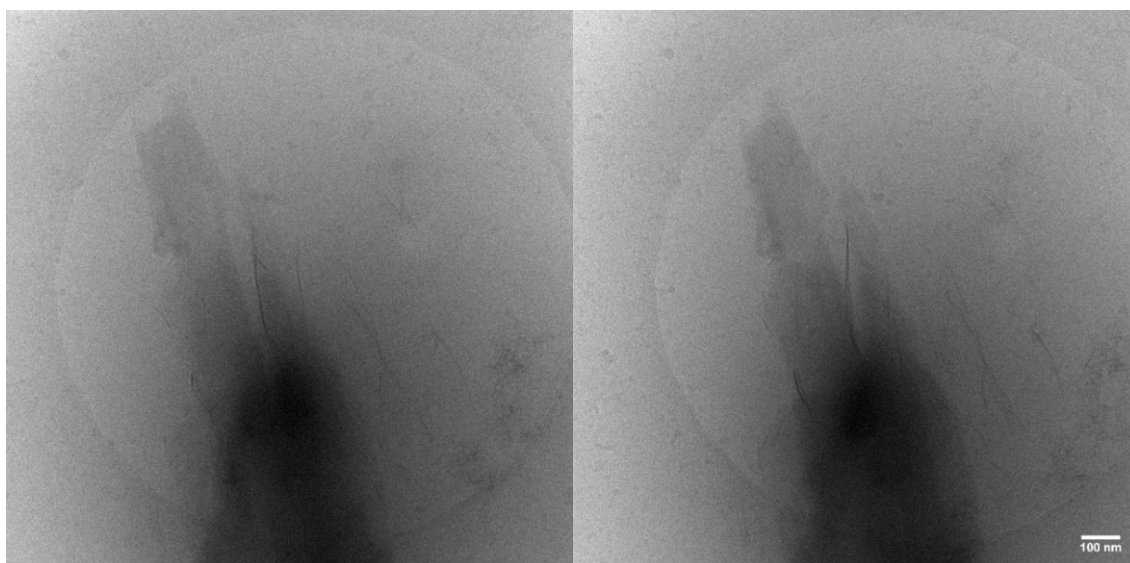

D

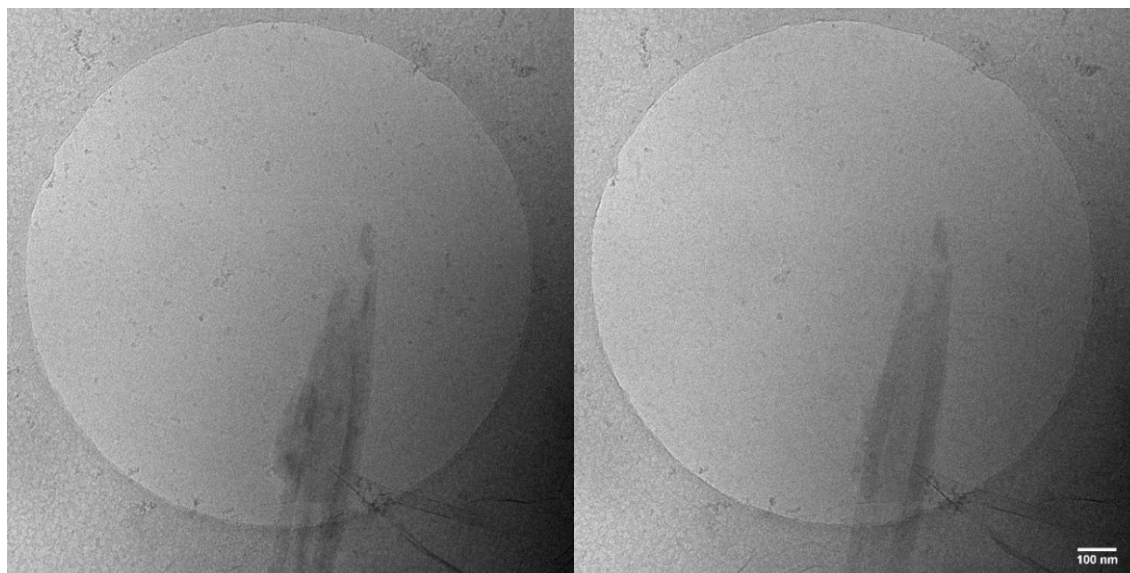

**Figure S3.** Cryo-TEM of PEG-G-PNIPAM (side-by-side stereograms): In order to provide a more spatial impression of the functionalized graphene sheets the same image sections like in Figure 2 d-g were recorded at two different angles ( $4^\circ$  and  $-4^\circ$ ) by tilting the compuStage of the microscope. To generate stereograms, the two recorded images were aligned using the software StereoPhoto Maker (Masuji Suto, Japan). (A, B) PEG-G-PNIPAM at room temperature, (C, D) PEG-G-PNIPAM above LCST.
